# Supplementary material for: Proteomic Analysis of Hippocampus in a Mouse Model of Depression Reveals Neuroprotective Function of Ubiquitin C-terminal Hydrolase L1 (UCH-L1) via Stress-induced Cysteine Oxidative Modifications
Source: PubMed Central journal article supplement (PMC6126396; doi:10.1074/mcp.ra118.000835), 2018-06-29
Supplement: 137938_1_supp_157109_pln5cz.pdf [file 137938_1_supp_157109_pln5cz.pdf]

## Supporting Information

### **Proteomic Analysis of Hippocampus in Depression Mouse Model Reveals Neuroprotective Function of Ubiquitin C-terminal Hydrolase L1 via Stress-induced Cysteine Oxidative Modifications**

Jung-Eun Choi<sup>1</sup>, Jae-Jin Lee<sup>1</sup>, Wonmo Kang<sup>1</sup>, Hyun Jung Kim<sup>1</sup>, Jin-Hwan Cho<sup>1</sup>, Pyung-Lim Han<sup>2</sup>, Kong-Joo Lee<sup>1\*</sup>

<sup>1</sup>College of Pharmacy and Graduate School of Pharmaceutical Sciences, and <sup>2</sup>Department of Brain and Cognitive Sciences, Ewha Womans University, Seoul, Korea 03760

\*Correspondence: [kjl@ewha.ac.kr](mailto:kjl@ewha.ac.kr)

#### **Table of contents**

Supplementary Experimental Procedures

Supplementary Figure 1

Supplementary Figure 2

Supplementary Table 1

Supplementary Figure 3

Supplementary Figure 4

Supplementary Figure 5

Supplementary Figure 6

Supplementary Figure 7

## **Supplementary Experimental Procedures**

### **Western analysis**

Protein concentration of hippocampal protein samples from control and stressed mice were determined by BCA assay kit (Pierce, USA) and 3 µg of protein per each lane was separated using SDS-PAGE. Proteins were transferred to hydrophobic PDVF membrane (Millipore, USA) and expression level of TPIS, PGAM1, PDXK and GAPDH as a loading control was examined using each primary antibody. Specific antibodies for TPIS, PGAM1 and PDXK were purchased from Abcam (UK), anti-GAPDH was from AbFrontier (Korea). LAS-3000 imaging system (Fujifilm, Japan) and Multi Gauge V3.0 (Fujifilm, Japan) were used to gain chemiluminescent signals and densitometry image analysis. For other 1D-Western analysis in Supplementary Figures, experiments were performed as described in Experimental Procedures. β-actin was used as loading control for soluble/ insoluble fractionation of UCH-L1 in HT-22 cells. β-actin antibody was from Santa Cruz Biotechnology (USA). All Western analysis were conducted under reducing condition.

### **Identification of overexpressed UCH-L1 spots in HT-22 cells**

HT-22 cells were plated at a density of  $1 \times 10^6$  cells/100 mm plate (n=4) and grown for 24 h. 6 µg of DNA plasmids (control plasmid; pcDNA3.1/myc-His(-) A vector, Myc-UCH-L1; control plasmid carrying wild-type (WT) UCH-L1) per each plate were transfected into cells using Lipofectamine 2000 reagent (Invitrogen, USA). Gel strips for 2D-PAGE were rehydrated for overnight. 24 h after transfection, cells were washed twice with 2 mL Hanks' Balanced Salt Solution (HBSS) to remove serum and treated with 0 or 1 mM of H<sub>2</sub>O<sub>2</sub> in HBSS for 1 h (37°C, 5% CO<sub>2</sub>). Cells were washed twice with 2 mL cold HBSS to completely remove residual H<sub>2</sub>O<sub>2</sub>. Cells were harvested by scrapping cells with 500 µL of PBS per plate and the cell suspension was centrifuged at  $2,500 \times g$  for 3 min at 4°C. Supernatant was removed and the remaining cell pellets were frozen in a -80°C deep freezer for a while. Pellets were then solubilized using the same lysis buffer for the hippocampus sample preparation by incubating samples at room temperature for 2 h with vortexing at 30 min intervals. The ratio of lysis buffer volume to cell pellet was 100: 12. Samples were centrifuged at  $10,000 \times g$  for 20 min at 4°C to remove cell debris and the supernatant was used for 2D-PAGE. 2D-

PAGE was performed as described in Experimental Procedures. Overexpressed UCH-L1 spots were found by comparing silver-stained gels, and 2D-western in large-gel scale was also carried out to verify the exact distribution of overexpressed myc-UCH-L1. For transfer of proteins to PDVF membrane and further Western analysis, gels were cut into 8 × 10 cm size by comparing with 1: 1 ratio printed image of silver-stained gels, covering the region containing overexpressed UCH-L1 spots. Five major spots were found and the spots were allowed for PTM analysis as described in Experimental Procedures.

#### **Fractionation of soluble and insoluble UCH-L1 in HT-22 cells**

To obtain soluble and insoluble fractions of UCH-L1, we followed the method reported by Kabuta *et al.* (Reference 17) with small changes. In brief, HT-22 cells were plated at the density of  $5 \times 10^5$  cells/60 mm plate, grown for 24 h, transfected with 3  $\mu$ g of DNA per plate (DNA plasmids used in this experiment are same as the plasmids used in xCELLigence RTCA experiments) using Lipofectamine 2000. Cells treated with 0 or 0.3 mM of H<sub>2</sub>O<sub>2</sub> in HBSS for 2 h (37°C, 5% CO<sub>2</sub>) as previously described, were lysed by scrapping cells with 1% Triton X-100 lysis buffer (250  $\mu$ L per plate), passed through blue tips for six times, incubated on ice for 15 min. After centrifugation at 20,000 × g for 10 min at 4°C, supernatants were mixed with the same amount of SDS gel sample buffer, boiled for 5 min at 95°C and this was the nonionic detergent-soluble fraction. Remaining pellets were washed once with lysis buffer, centrifuged at the same condition, and remaining supernatants are clearly removed. 100  $\mu$ L of SDS gel sample buffer was directly added to the pellet, boiled for 5 min at 95°C and this was the nonionic detergent-insoluble fraction. As a result, the insoluble fraction is 5 times more concentrated (5x) than the soluble fraction. Soluble and insoluble fractions of UCH-L1 (wild-type and cysteine mutants) were assessed by Western analysis.

## Supplementary Figure Legends

**Supplementary Figure 1.** Representative 2D-PAGE images of hippocampal proteins of control, CRS-9D and CRS-14D mouse.

**Supplementary Figure 2.** Changes in expression level of TPIS, PGAM1 and PDXK as shown in Figure 3 were verified by Western analysis. (A) Western analysis of hippocampal protein samples from control and stressed mouse (CRS-9D, CRS-14D) showed expression levels of TPIS, PGAM and PDXK. GAPDH was loading control. (B) Densitometry analysis shows quantification results for the blots. Band intensities of each protein was normalized to the intensity of GAPDH. Data were presented as the means  $\pm$  S.E. of three independent blots (\*\* $P < 0.01$ , \*\*\* $P < 0.001$ ).

**Supplementary Figure 3.** Protein expression levels of endogenous and overexpressed UCH-L1 were detected by Western analysis using anti-UCH-L1 antibody. Samples from Figure 7 were subjected to Western analysis. Tubulin was used as loading control.

**Supplementary Figure 4.** Identification of overexpressed UCH-L1 spots in HT-22 cells. HT-22 cells were transfected with pcDNA3.1/myc-His(-) A vector and the same vector carrying human UCH-L1 wild-type clone respectively, treated with 0 or 1 mM  $H_2O_2$  and separated by 2D-PAGE. (A) Partial 2D gel images showing UCH-L1 spots overexpressed in HT-22 cells. Five UCH-L1 spots were designated with arrows. (B) Verification of overexpressed UCH-L1 spots using 2D-western analysis. Experiment was performed in large-gel scale.

**Supplementary Figure 5.** Full 2D-gel images of HT-22 cells overexpressing control myc vector or myc-UCH-L1. Full images of 2D-gels presented in Supplementary Figure 4A shows protein expression profiles of HT-22 cells treated with 0 or 1 mM of  $H_2O_2$ . Box indicates the region cropped for Supplementary Figure 4A.

**Supplementary Figure 6.** Soluble and insoluble fraction of wild-type and Cys mutants of UCH-L1 in response to oxidative stress. HT-22 cells overexpressing WT and Cys to Ser mutants (A) or WT and Cys to Asp mutants (B) of UCH-L1 were exposed to 0 or 0.3 mM  $H_2O_2$  and then soluble and insoluble fractions were separated by cellular fractionation. Control (designated as Cont) means cells transfected with empty pcDNA3.1/myc-His(-) A vector. Proteins from each fraction were analyzed by Western blotting and band intensities of each blot were quantified by densitometry analysis.  $\beta$ -actin was used as loading control. Signal intensity of UCH-L1 was normalized to that of  $\beta$ -

actin. Bar graphs show relative signal intensities of various UCH-L1 constructs compared to the signal intensity of wild-type UCH-L1 treated with 0 mM H<sub>2</sub>O<sub>2</sub>. Data were shown as the means ± S.E. of triplicates (ns: not significant, \**P*<0.05, \*\**P*<0.01, \*\*\**P*<0.001).

**Supplementary Figure 7.** Representative MS/MS spectra of post-translationally modified peptides of UCH-L1 listed in Table 2 and 3 (in the order of appearance in the table).

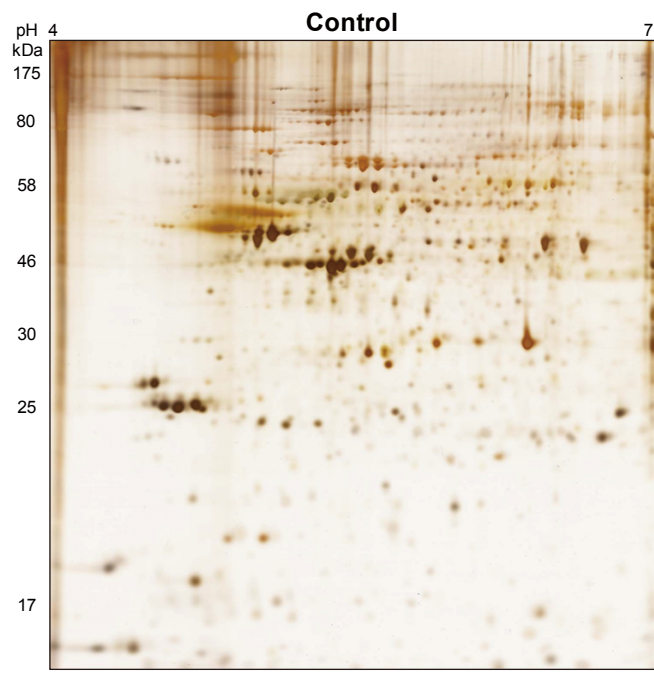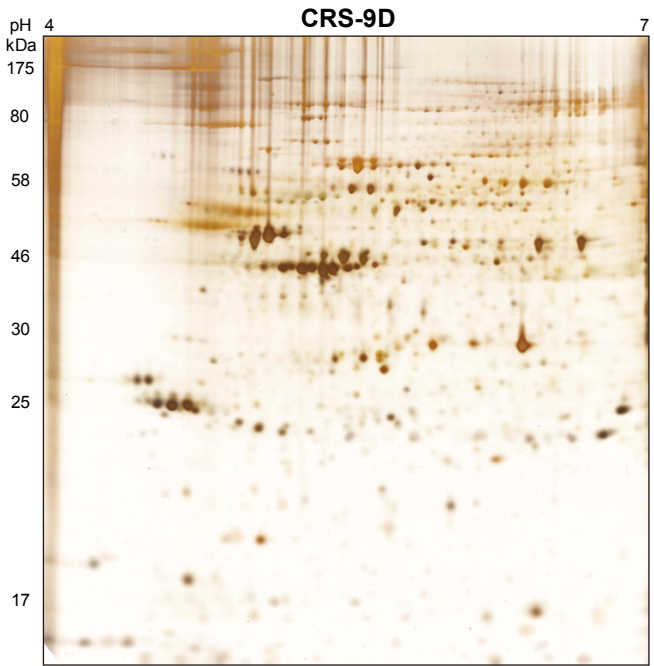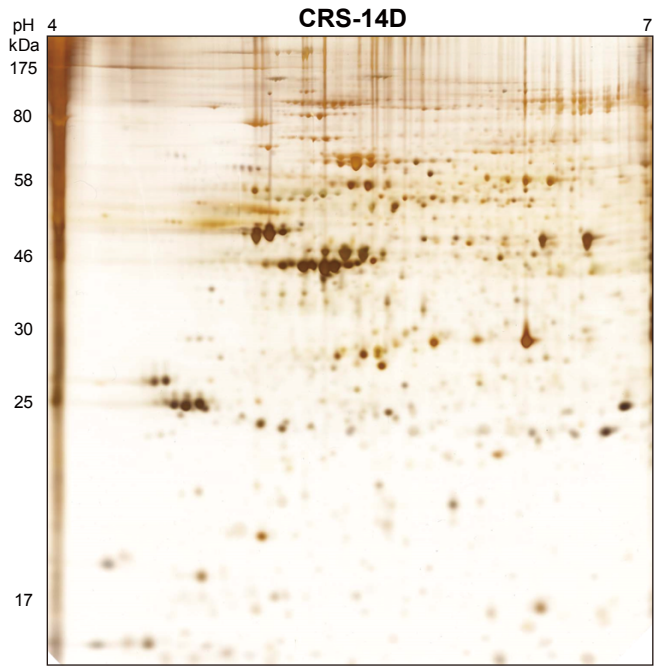

**Supplementary Figure 1**

Representative 2D-PAGE images of hippocampal proteins of control, CRS-9D and CRS-14D mouse.

**A**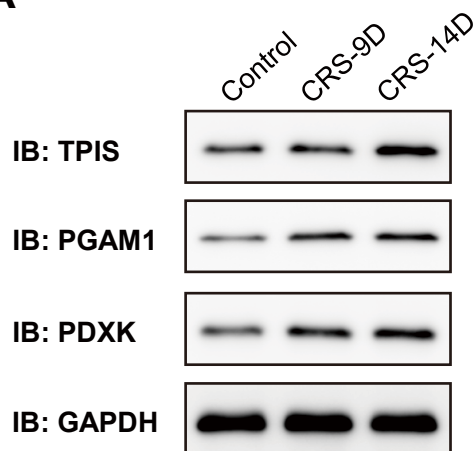**B**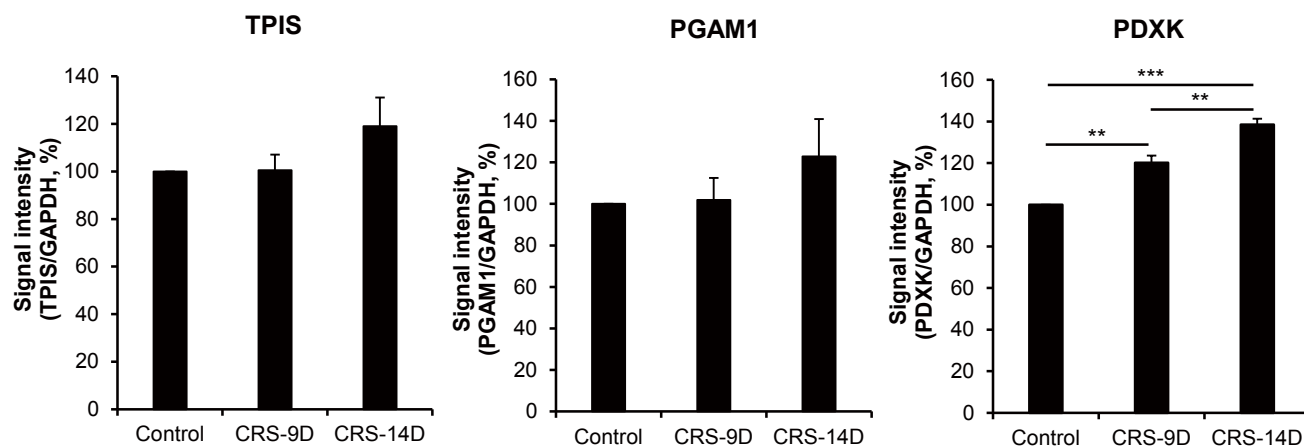**Supplementary Figure 2**

Changes in expression level of TPIS, PGAM1 and PDXK as shown in Figure 3 were verified by Western analysis. (A) Western analysis of hippocampal protein samples from control and stressed mouse (CRS-9D, CRS-14D) showed expression levels of TPIS, PGAM and PDXK. GAPDH was loading control. (B) Densitometry analysis shows quantification results for the blots. Band intensities of each protein was normalized to the intensity of GAPDH. Data were presented as the means  $\pm$  S.E. of three independent blots (\*\*P<0.01, \*\*\*P<0.001).

**Supplementary Table 1.** Ambiguous modifications found in UCH-L1 spots. Ambiguous post-translational modifications of UCH-L1 spots 1 to 4 in figure 5A were shown in table below. Modifications found in acidic spots were colored in red, those found in basic spots were in blue and modification found in all spots was colored in green.

| Start-End | Mass Experimental (m/z) | Mass Observed | Mass Theoretical (Da) | Delta Mass (Da) | Sequence / Modification                                                                                | Spots found                            |
|-----------|-------------------------|---------------|-----------------------|-----------------|--------------------------------------------------------------------------------------------------------|----------------------------------------|
| 1 - 15    | 952.1866                | 1902.3586     | 1901.8824             | 0.4763          | MQLKPMIENPEMLNK / 2 Acetyl (K); 3 Deamidated (NQ)                                                      | Control: 3                             |
| 1 - 15    | 635.9644                | 1904.8714     | 1904.9045             | -0.0332         | MQLKPMIENPEMLNK / Acetyl (K); 3 Oxidation (M)                                                          | Control: 2, 3<br>Stress: 2, 3, 4       |
| 1 - 19    | 768.3912                | 2302.1518     | 2302.1622             | -0.0104         | MQLKPMIENPEMLNK/LAK / Acetyl (K); 2 Deamidated (NQ); 2 Oxidation (M)                                   | Stress: 4                              |
| 28 - 64   | 1042.0044               | 4163.9885     | 4164.0530             | -0.0645         | FADVLGLEEETLGSVSPACALLPLTAQHENFRK / Carbamidomethyl (C); 2 Deamidated (NQ); Phospho (ST)               | Control: 3                             |
| 65 - 71   | 465.7620                | 929.5094      | 929.5069              | 0.0025          | KQIEELK / Acetyl (K); Deamidated (NQ)                                                                  | Control: 3<br>Stress: 3, 4             |
| 66 - 78   | 782.8781                | 1563.7416     | 1563.7545             | -0.0129         | QIEELKGEVSPK / Phospho (ST)                                                                            | Control: 1, 2, 3<br>Stress: 1, 2, 3, 4 |
| 66 - 78   | 804.8133                | 1607.6120     | 1607.7331             | -0.1210         | QIEELKGEVSPK / Acetyl (K); 2 Deamidated (NQ); Phospho (ST)                                             | Stress: 1                              |
| 72 - 83   | 768.3280                | 1534.6414     | 1534.6779             | -0.0364         | GOEVSPKYFVK / Acetyl (K); Deamidated (NQ); Phospho (ST)                                                | Stress: 1                              |
| 79 - 105  | 775.3681                | 3097.4433     | 3097.3803             | 0.0630          | VYFMKQTIGNSCGTIGLIHAVANNQDK / Oxidation (M); Phospho (ST); Phospho (Y)                                 | Stress: 4                              |
| 79 - 105  | 1089.9045               | 3266.6917     | 3266.5644             | 0.1273          | VYFMKQTIGNSCGTIGLIHAVANNQDK / Acetyl (K); 3 Deamidated (NQ); Oxidation (M); Phospho (ST); Farnesyl (C) | Stress: 2                              |
| 84 - 105  | 806.7441                | 2417.2105     | 2416.9859             | 0.2246          | QTIGNSCGTIGLIHAVANNQDK / 4 Deamidated (NQ); 2 Phospho (ST)                                             | Control: 3<br>Stress: 2                |
| 84 - 115  | 1140.2069               | 3417.5989     | 3417.6133             | -0.0144         | QTIGNSCGTIGLIHAVANNQDKLEFEGGSVLK / Acetyl (K); 5 Deamidated (NQ)                                       | Control: 2                             |
| 84 - 115  | 858.1680                | 3428.6429     | 3428.6882             | -0.0453         | QTIGNSCGTIGLIHAVANNQDKLEFEGGSVLK / Acetyl (K); Oxidation (C)                                           | Control: 1                             |
| 84 - 115  | 1170.5688               | 3508.6846     | 3508.6545             | 0.0301          | QTIGNSCGTIGLIHAVANNQDKLEFEGGSVLK / Acetyl (K); Phospho (ST); Oxidation (C)                             | Control: 1                             |
| 130 - 135 | 412.7447                | 823.4748      | 823.3898              | 0.0850          | AKCFEK / Acetyl (K); Carbamidomethyl (C)                                                               | Control: 2                             |
| 132 - 153 | 864.3805                | 2590.1197     | 2590.1176             | 0.0021          | CFEKNEAIQAAHDSVAQEGQCR / Acetyl (K); 2 Carbamidomethyl (C); Deamidated (NQ)                            | Control: 2                             |
| 136 - 153 | 669.6036                | 2005.7890     | 2005.8313             | -0.0423         | NEAIQAAHDSVAQEGQCR / Phospho (ST)                                                                      | Control: 1, 2, 3<br>Stress: 1, 2, 3    |
| 136 - 153 | 688.6159                | 2062.8259     | 2062.8528             | -0.0269         | NEAIQAAHDSVAQEGQCR / Carbamidomethyl (C); Phospho (ST)                                                 | Control: 1, 2, 3<br>Stress: 2, 3       |
| 136 - 153 | 1027.9089               | 2053.8032     | 2053.8160             | -0.0128         | NEAIQAAHDSVAQEGQCR / Phospho (ST); Trioxidation (C)                                                    | Control: 3<br>Stress: 3, 4             |
| 136 - 153 | 666.6362                | 1996.8868     | 1996.9021             | -0.0153         | NEAIQAAHDSVAQEGQCR / Carbamidomethyl (C); Methyl (R)                                                   | Control: 2<br>Stress: 1                |
| 136 - 153 | 1040.4309               | 2078.8472     | 2078.8364             | 0.0108          | NEAIQAAHDSVAQEGQCR / Carbamidomethyl (C); 2 Deamidated (NQ); Phospho (ST); Methyl (R)                  | Control: 2                             |
| 136 - 153 | 652.6321                | 1954.8745     | 1954.8551             | 0.0194          | NEAIQAAHDSVAQEGQCR / Nitrosyl (C)                                                                      | Control: 2                             |
| 136 - 153 | 637.6448                | 1909.9126     | 1909.8878             | 0.0248          | NEAIQAAHDSVAQEGQCR / -16 (C)                                                                           | Control: 2<br>Stress: 3, 4             |
| 136 - 153 | 979.9309                | 1957.8472     | 1957.8548             | -0.0075         | NEAIQAAHDSVAQEGQCR / Dioxidation (C)                                                                   | Control: 3<br>Stress: 3, 4             |
| 179 - 199 | 1147.4873               | 2292.9600     | 2293.0086             | -0.0485         | MPPFVNHGASSEDSLQDAAK / Phospho (ST)                                                                    | Stress: 1, 3, 4                        |
| 208 - 221 | 536.8807                | 1607.6203     | 1607.7977             | -0.1775         | EGQEVRFSAVALCK / Carbamidomethyl (C); Deamidated (NQ); Methyl (R)                                      | Stress: 1                              |
| 214 - 221 | 488.2601                | 974.5056      | 974.4296              | 0.0760          | FSAVALCK / Carbamidomethyl (C); Phospho (ST)                                                           | Stress: 1                              |
| 214 - 221 | 933.9376                | 932.9303      | 933.4031              | -0.4728         | FSAVALCK / Phospho (ST); Oxidation (C)                                                                 | spot 2 (pooled)                        |
| 214 - 223 | 567.7961                | 1133.5776     | 1133.4828             | 0.0949          | FSAVALCKAA / Acetyl (K); Phospho (ST); Dioxidation (C)                                                 | spot 3 (pooled)                        |



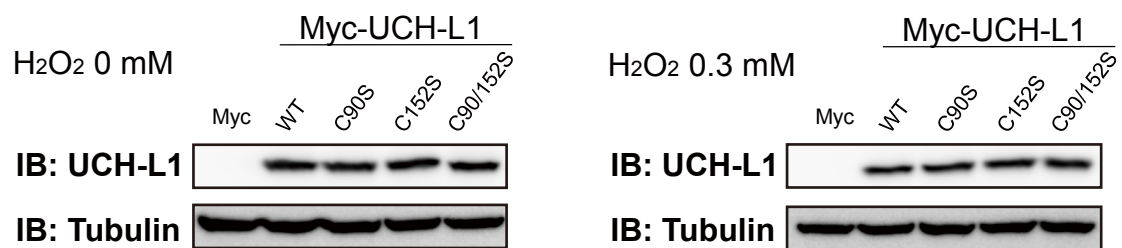

**Supplementary Figure 3**

Protein expression levels of endogenous and overexpressed UCH-L1 were detected by Western analysis using anti-UCH-L1 antibody. Samples from Figure 7 were subjected to Western analysis. Tubulin was used as loading control.

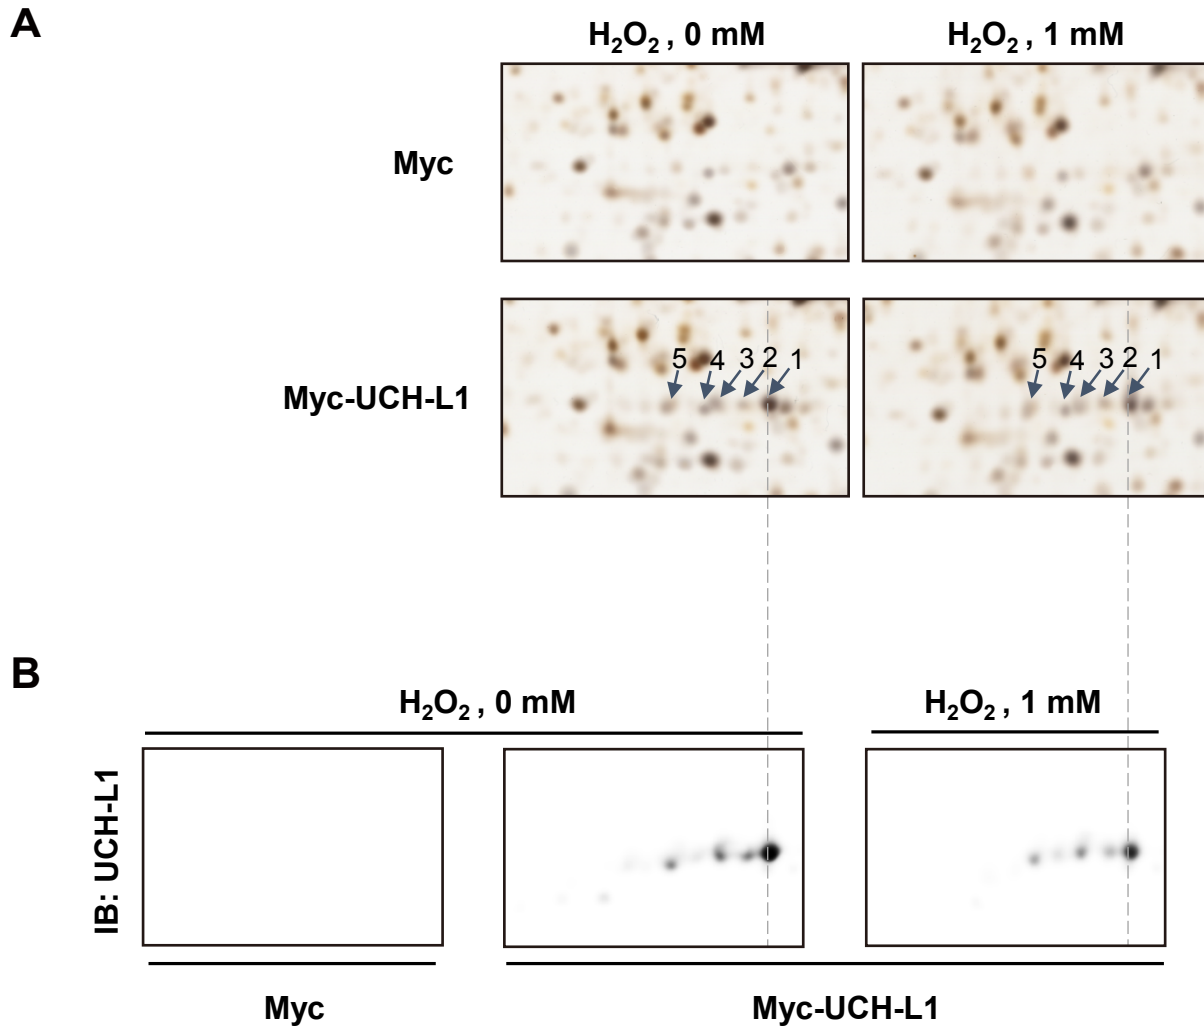

**Supplementary Figure 4**

Identification of overexpressed UCH-L1 spots in HT-22 cells. HT-22 cells were transfected with pcDNA3.1/myc-His(-) A vector and the same vector carrying human UCH-L1 wild-type clone respectively, treated with 0 or 1 mM  $H_2O_2$  and separated by 2D-PAGE. (A) Partial 2D gel images showing UCH-L1 spots overexpressed in HT-22 cells. Five UCH-L1 spots were designated with arrows. (B) Verification of overexpressed UCH-L1 spots using 2D-western analysis. Experiment was performed in large-gel scale.

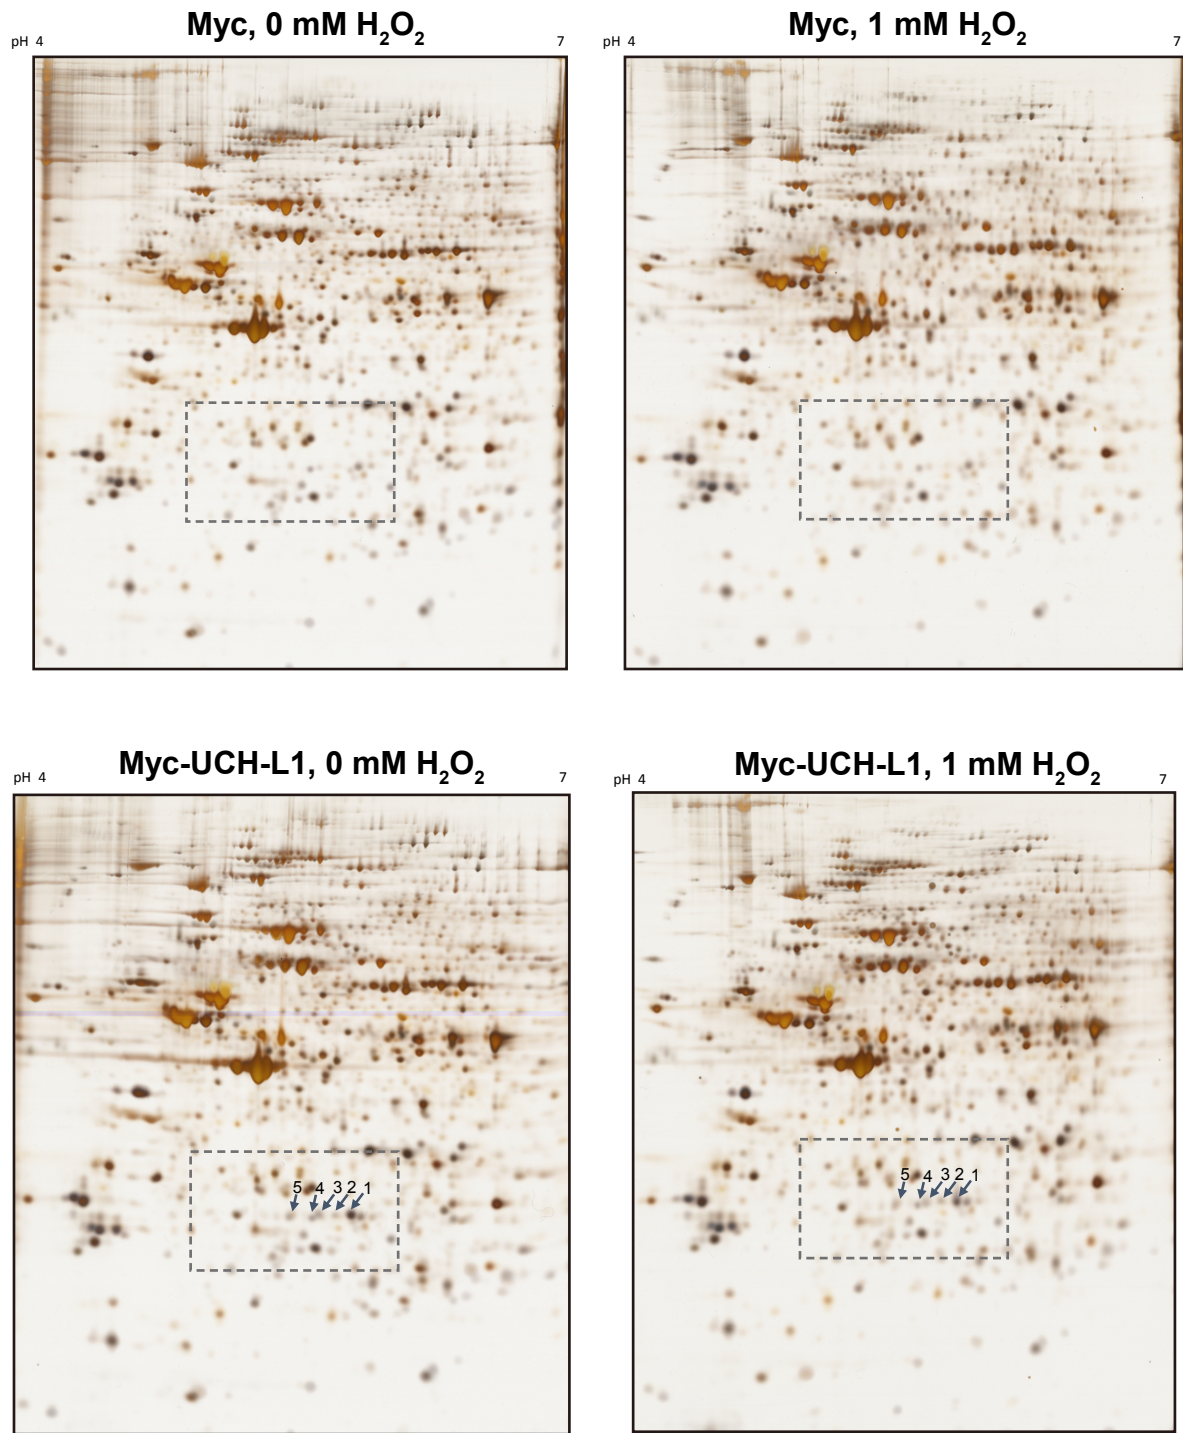

**Supplementary Figure 5**

Full 2D-gel images of HT-22 cells overexpressing control myc vector or myc-UCH-L1. Full images of 2D-gels presented in Supplementary Figure 4A shows protein expression profiles of HT-22 cells treated with 0 or 1 mM of H<sub>2</sub>O<sub>2</sub>. Box indicates the region cropped for Supplementary Figure 4A.

**A**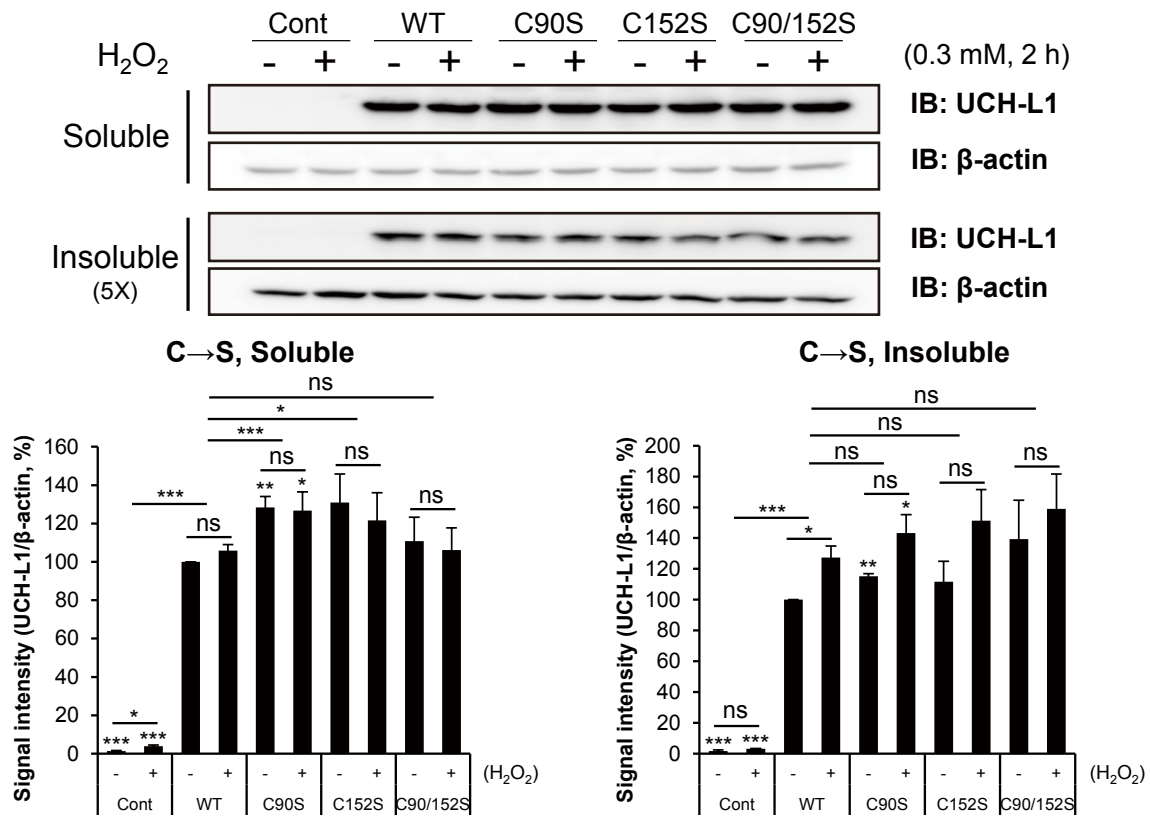**B**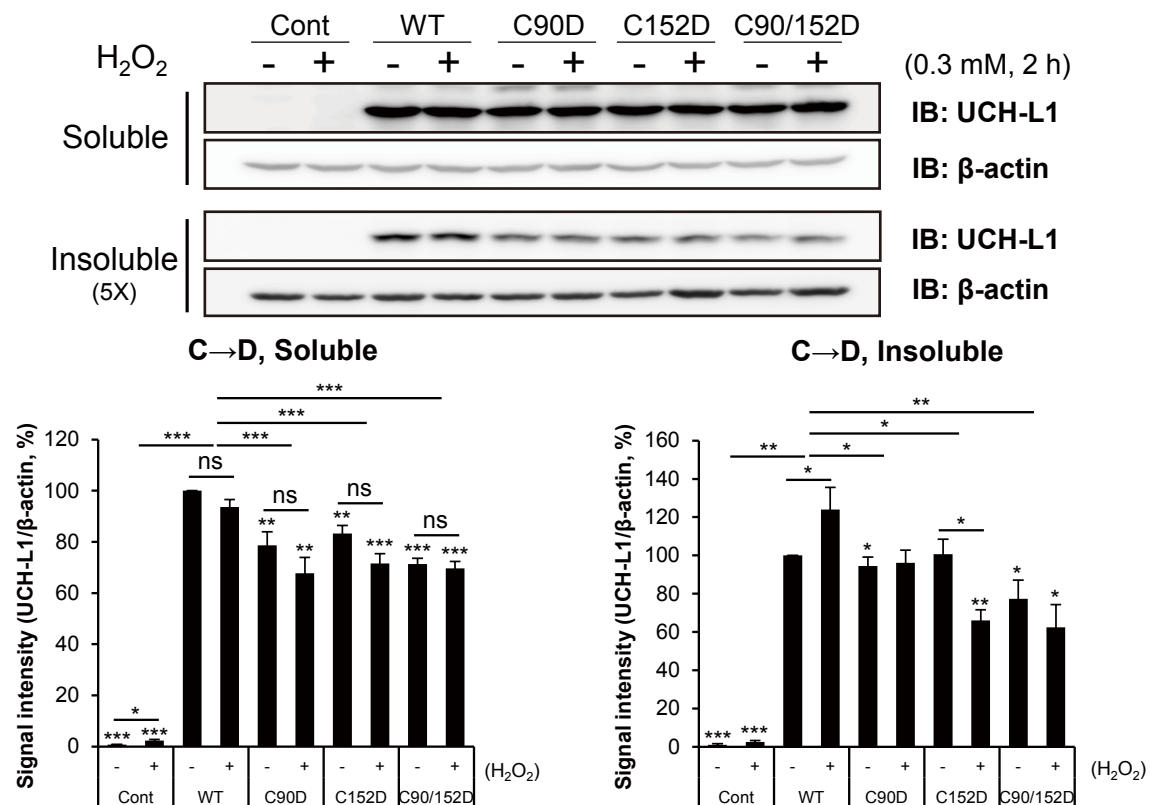**Supplementary Figure 6**

Soluble and insoluble fraction of wild-type and Cys mutants of UCH-L1 in response to oxidative stress. HT-22 cells overexpressing WT and Cys to Ser mutants (A) or WT and Cys to Asp mutants (B) of UCH-L1 were exposed to 0 or 0.3 mM H<sub>2</sub>O<sub>2</sub> and then soluble and insoluble fractions were separated by cellular fractionation. Control (designated as Cont) means cells transfected with empty pcDNA3.1/myc-His(-) A vector. Proteins from each fraction were analyzed by Western blotting and band intensities of each blot were quantified by densitometry analysis.  $\beta$ -actin was used as loading control. Signal intensity of UCH-L1 was normalized to that of  $\beta$ -actin. Bar graphs show relative signal intensities of various UCH-L1 constructs compared to the signal intensity of wild-type UCH-L1 treated with 0 mM H<sub>2</sub>O<sub>2</sub>. Data were shown as the means  $\pm$  S.E. of triplicates (ns: not significant, \*P<0.05, \*\*P<0.01, \*\*\*P<0.001).

<sup>84</sup>QTIGNSCGTIGLIHAVANNQDKLEFEDGSVLK<sup>115</sup> + Dioxidation (C90)

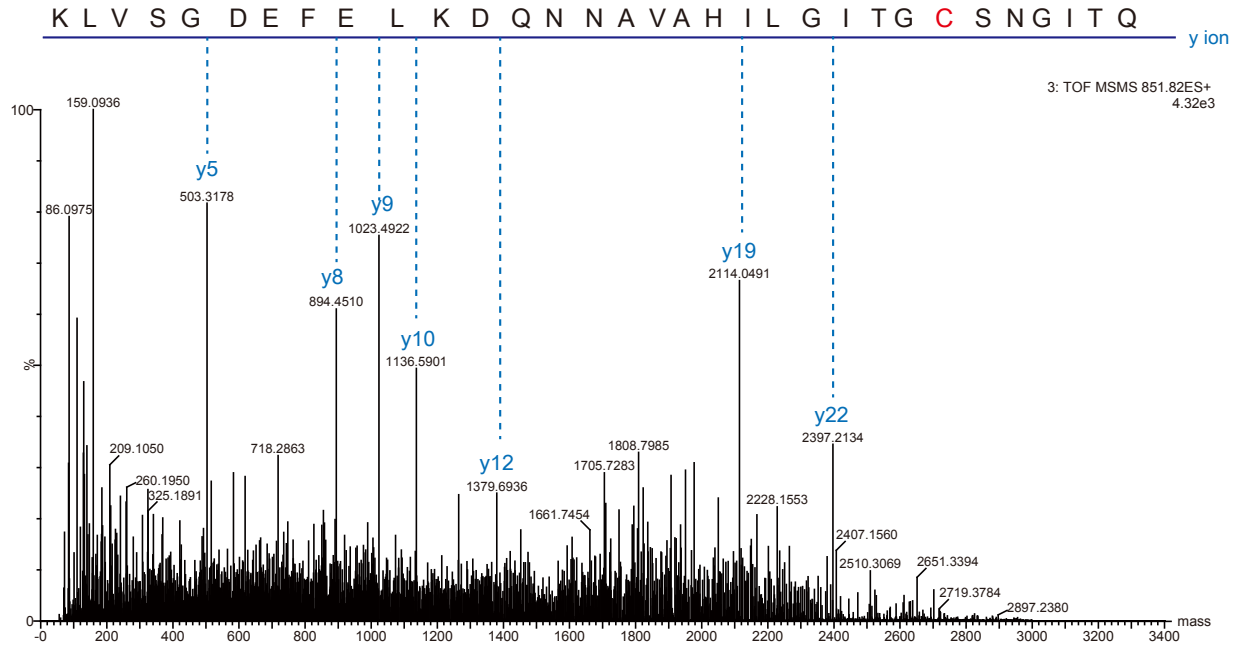

<sup>84</sup>QTIGNSCGTIGLIHAVANNQDKLEFEDGSVLK<sup>115</sup> + Trioxidation (C90)

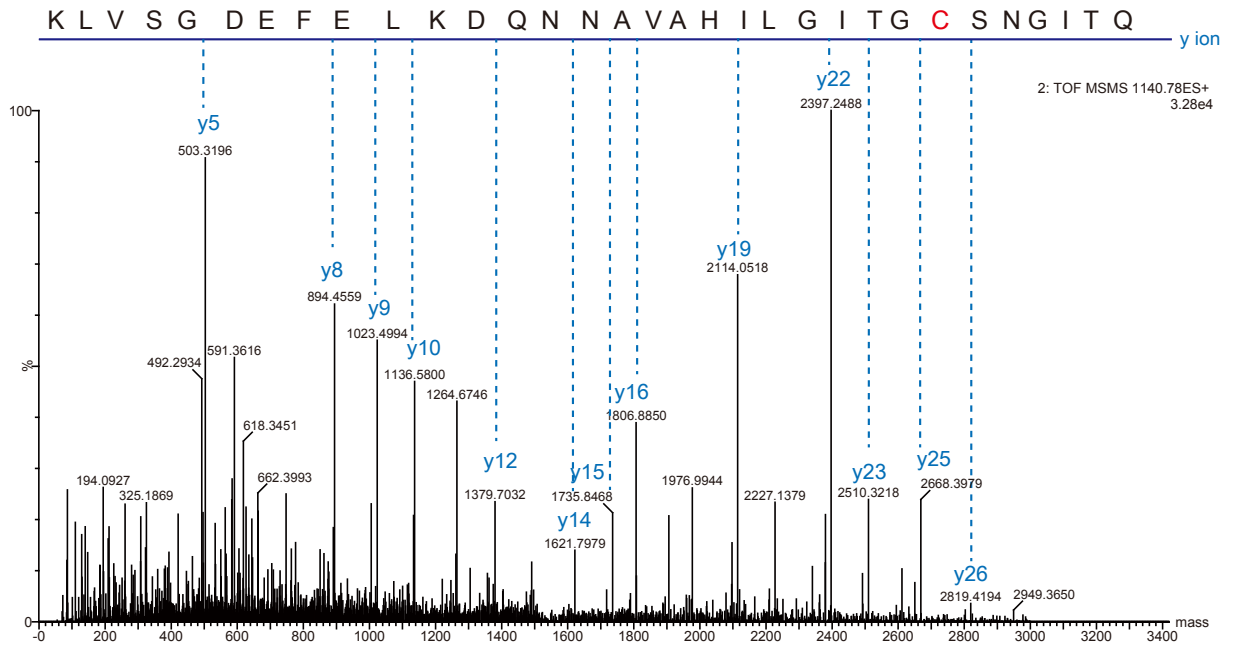

**Supplementary Figure 7**

Representative MS/MS spectra of post-translationally modified peptides of UCH-L1 listed in Table 2 and 3 (in the order of appearance in the table).

<sup>84</sup>QTIGNSCGTIGLIHAVANNQDKLEFEDGSVLK<sup>115</sup> + SO<sub>2</sub>-SH (C90)

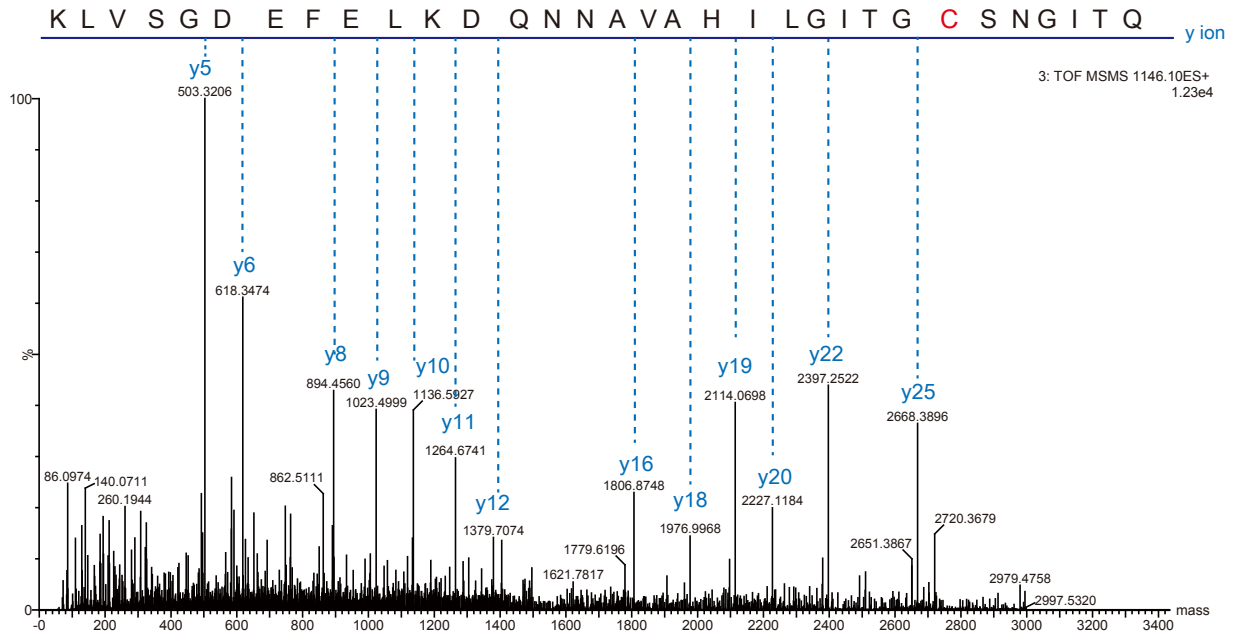

<sup>136</sup>NEAIQAHDSSVAQEGQC<sup>153</sup> + Trioxidation (C152)

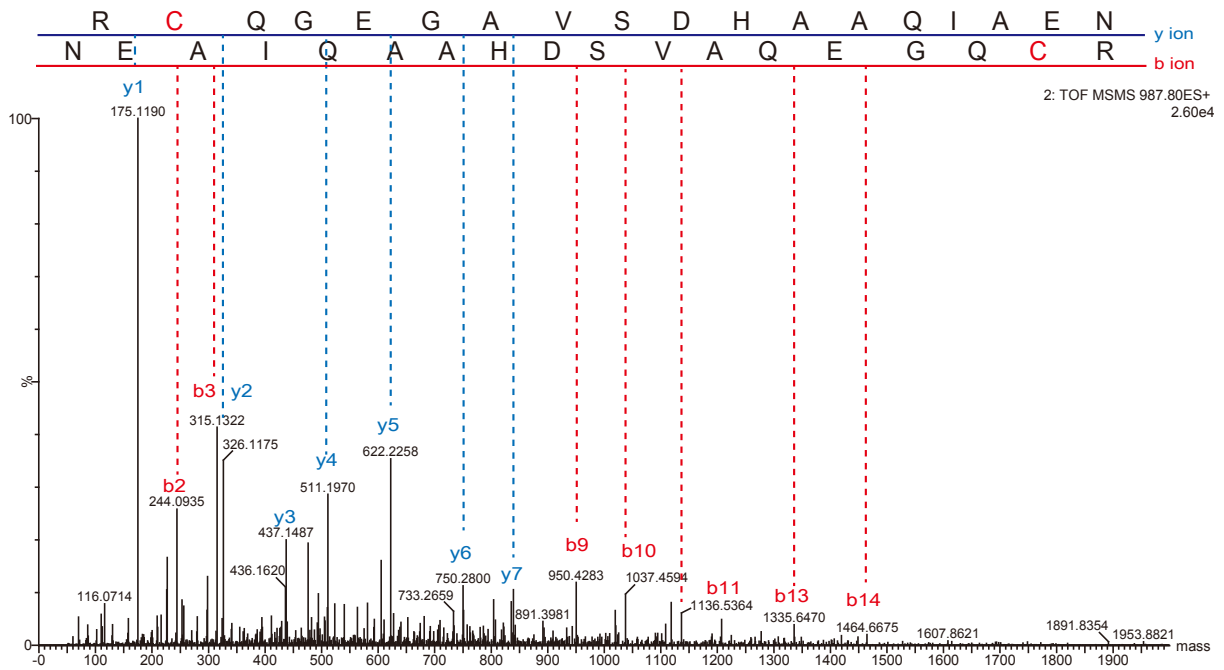

Supplementary Figure 7 (Continued)

<sup>136</sup>NEAIQAAHDSVAQEGQCR<sup>153</sup> + SO<sub>2</sub>-SH (C152)

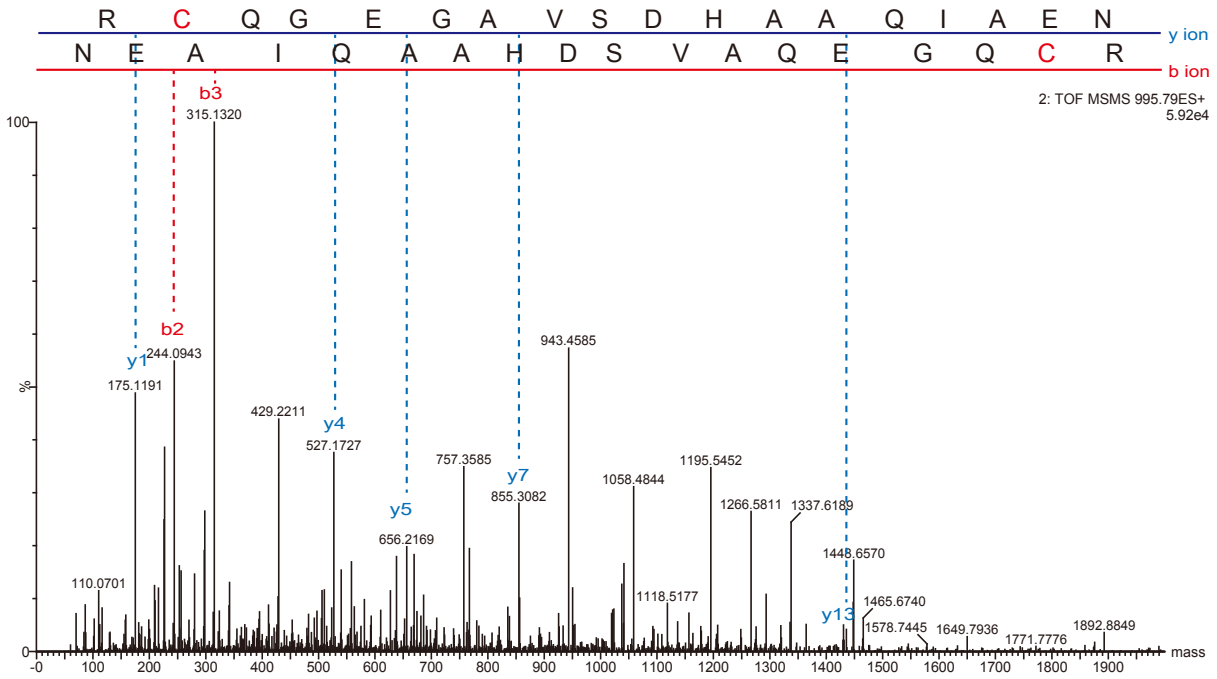

<sup>84</sup>QTIGNSCGTIGLIHAVANNQDKLEFEDGSVLK<sup>115</sup> + Phosphorlation (T85), Trioxidation (C90)

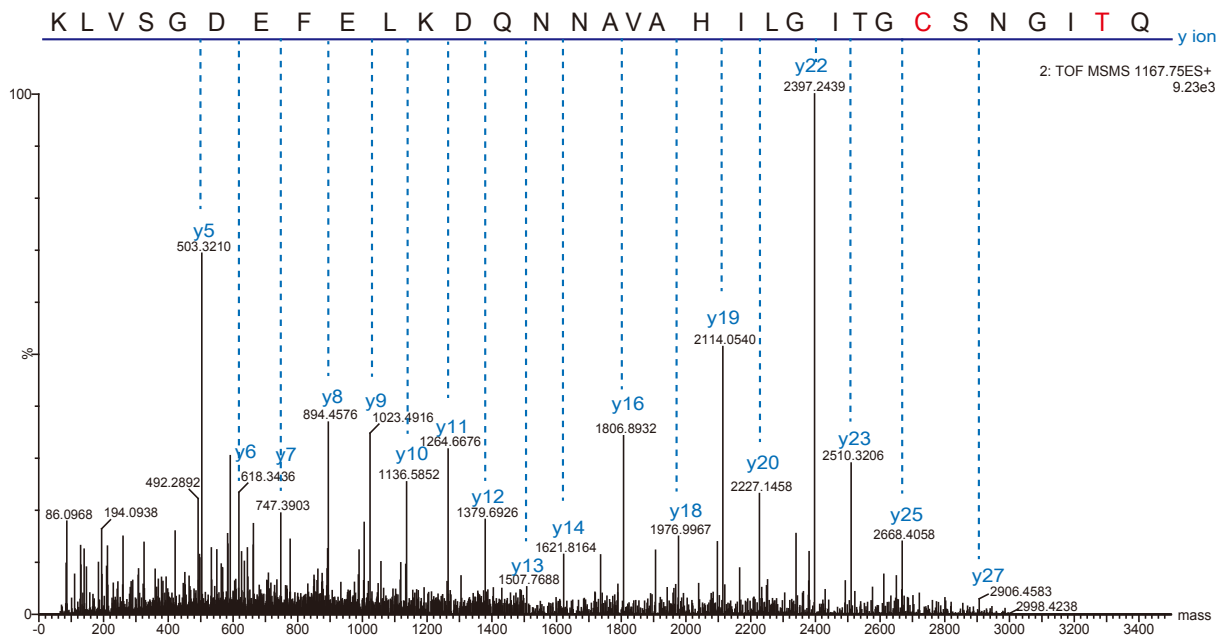

Supplementary Figure 7 (Continued)

<sup>116</sup>QLFSETEKLSPEDR<sup>129</sup> + Phosphorylation (S119)

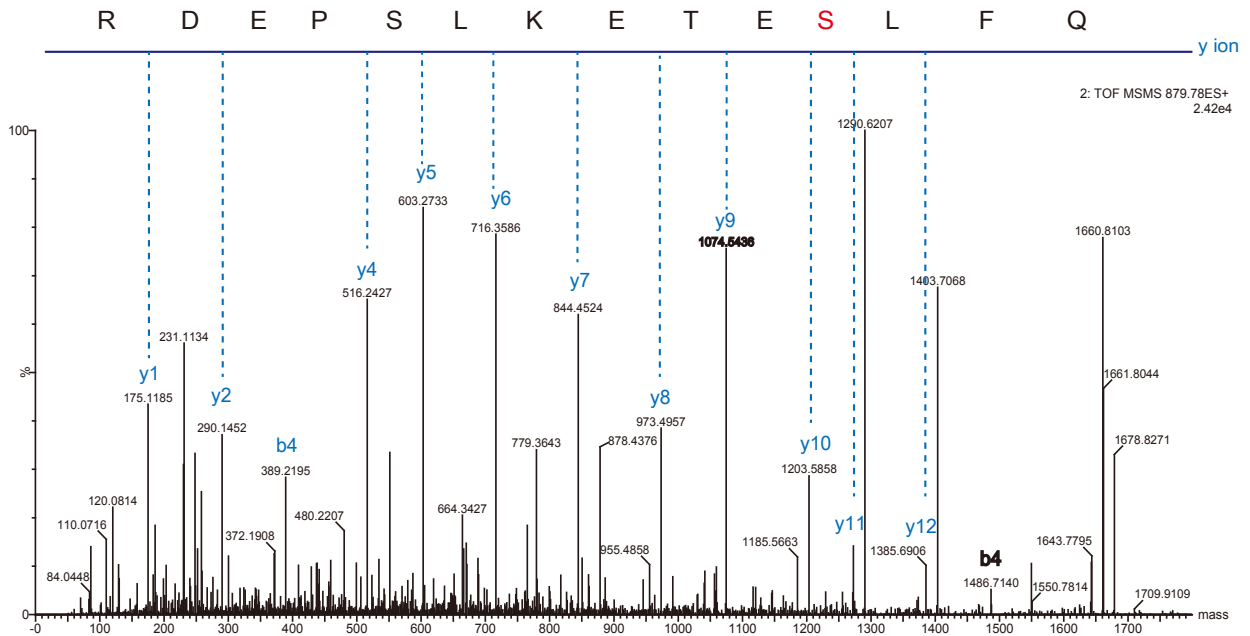

<sup>179</sup>MPFPVNHGASSEDLLQDAAK<sup>199</sup> + Phosphorylation (S188), Oxidation (M179), Deamidation (N184)

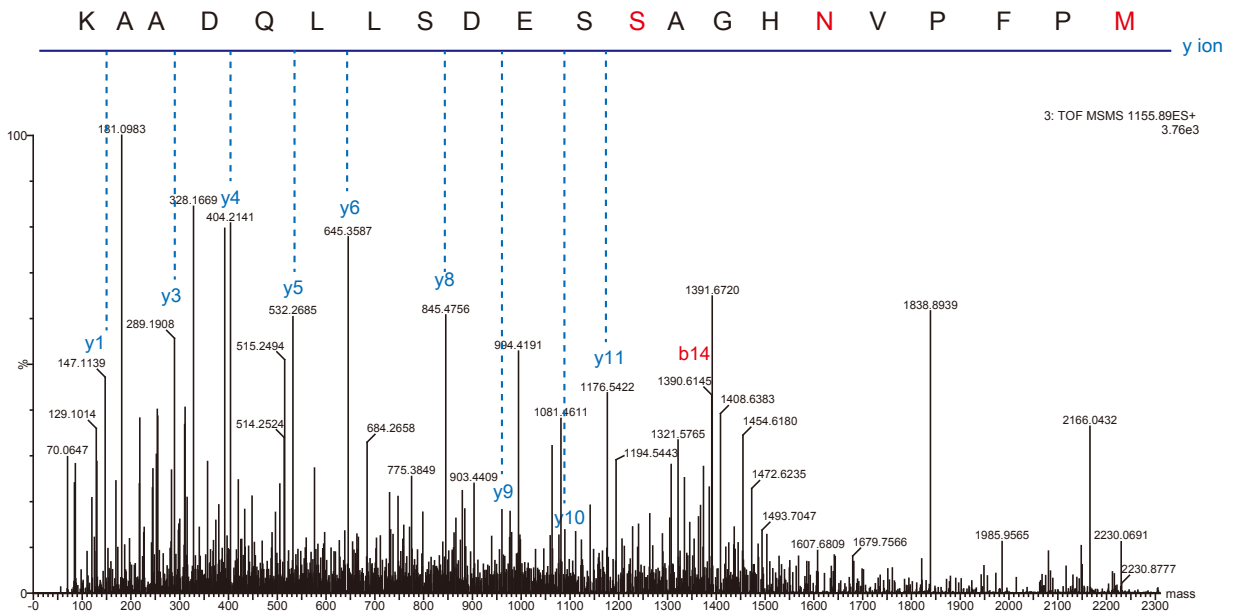

Supplementary Figure 7 (Continued)



<sup>66</sup>QIEELKQGEVSPK<sup>78</sup> + Acetylation (K71), Deamidation (Q66)

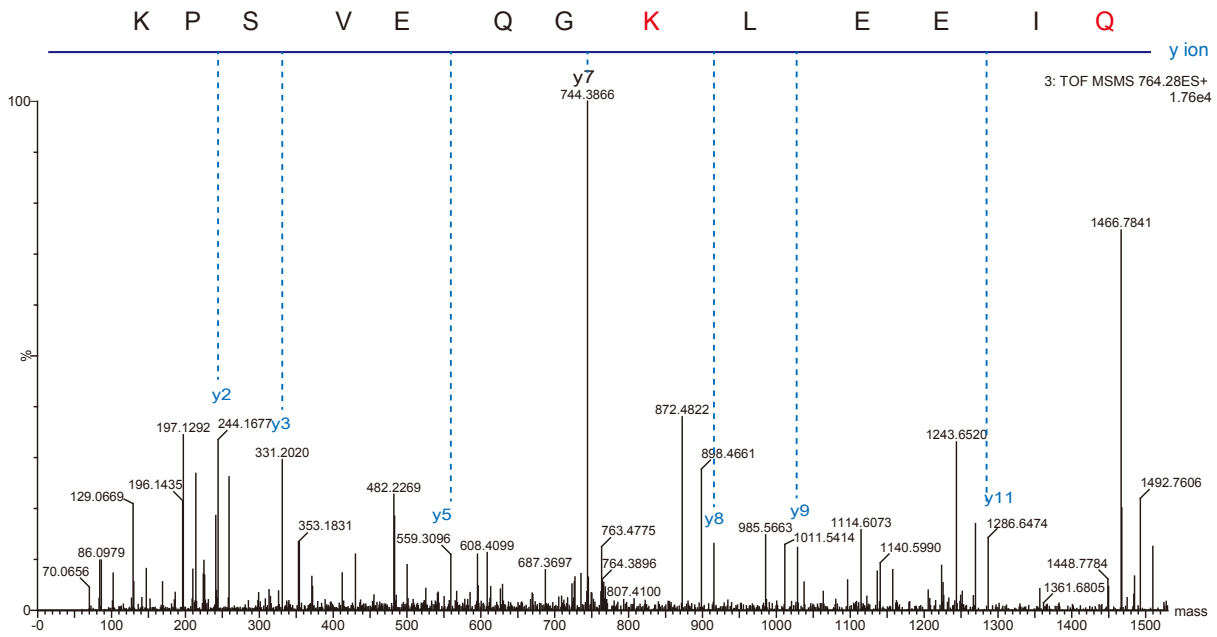

<sup>116</sup>QFLSETEKLSPEDR<sup>129</sup> + Acetylation (K123)

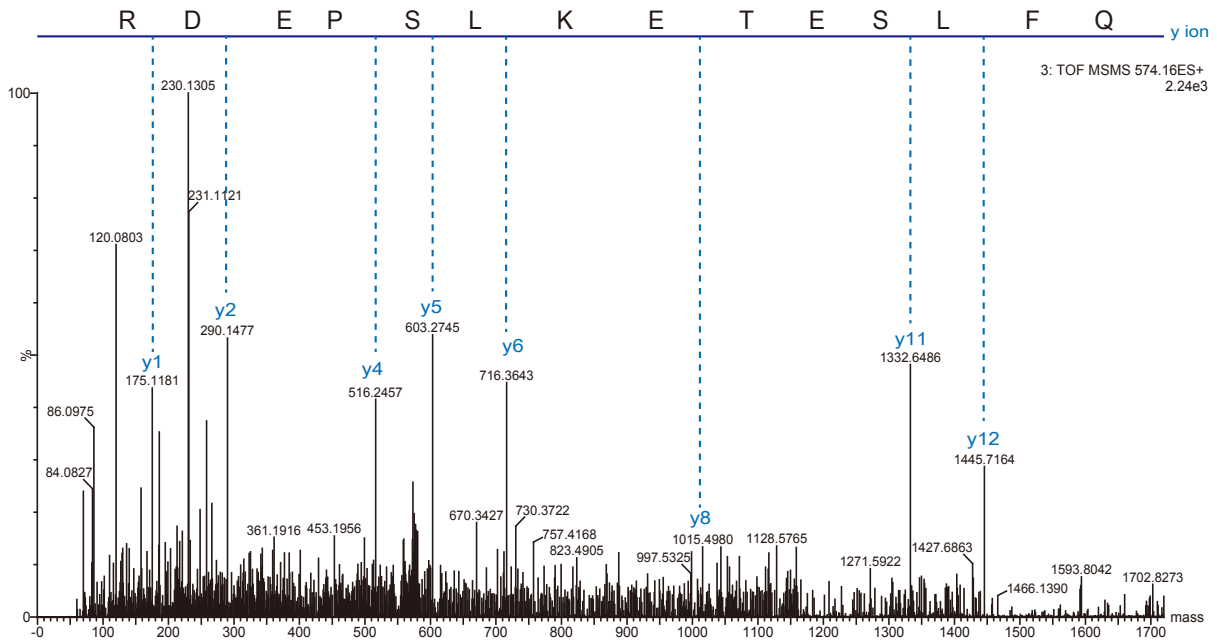

Supplementary Figure 7 (Continued)
